# Supplementary material
Source: PubMed Central journal article supplement (PMC8684441)

Supplementary Materials

**Figure S1.** The proportion of participants (N = 62) in each attention group who identified event boundaries during each sentence of a story. Sentences containing character shifts (“CHAR”) and spatial shifts (SPATIAL) are indicated along the x-axis in each panel.

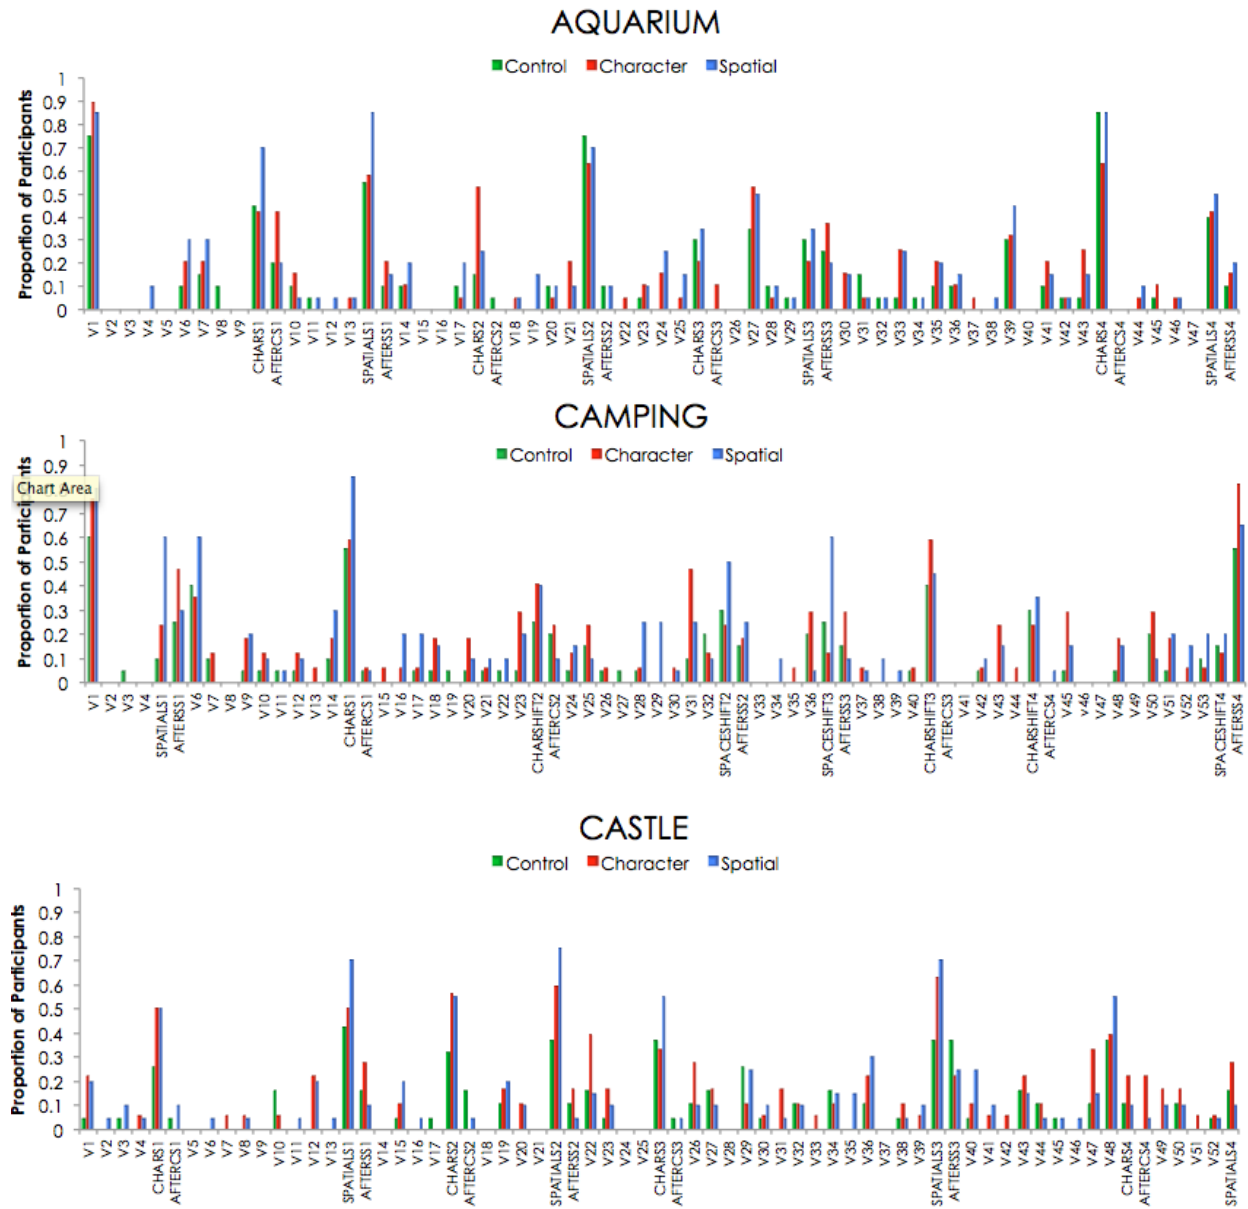

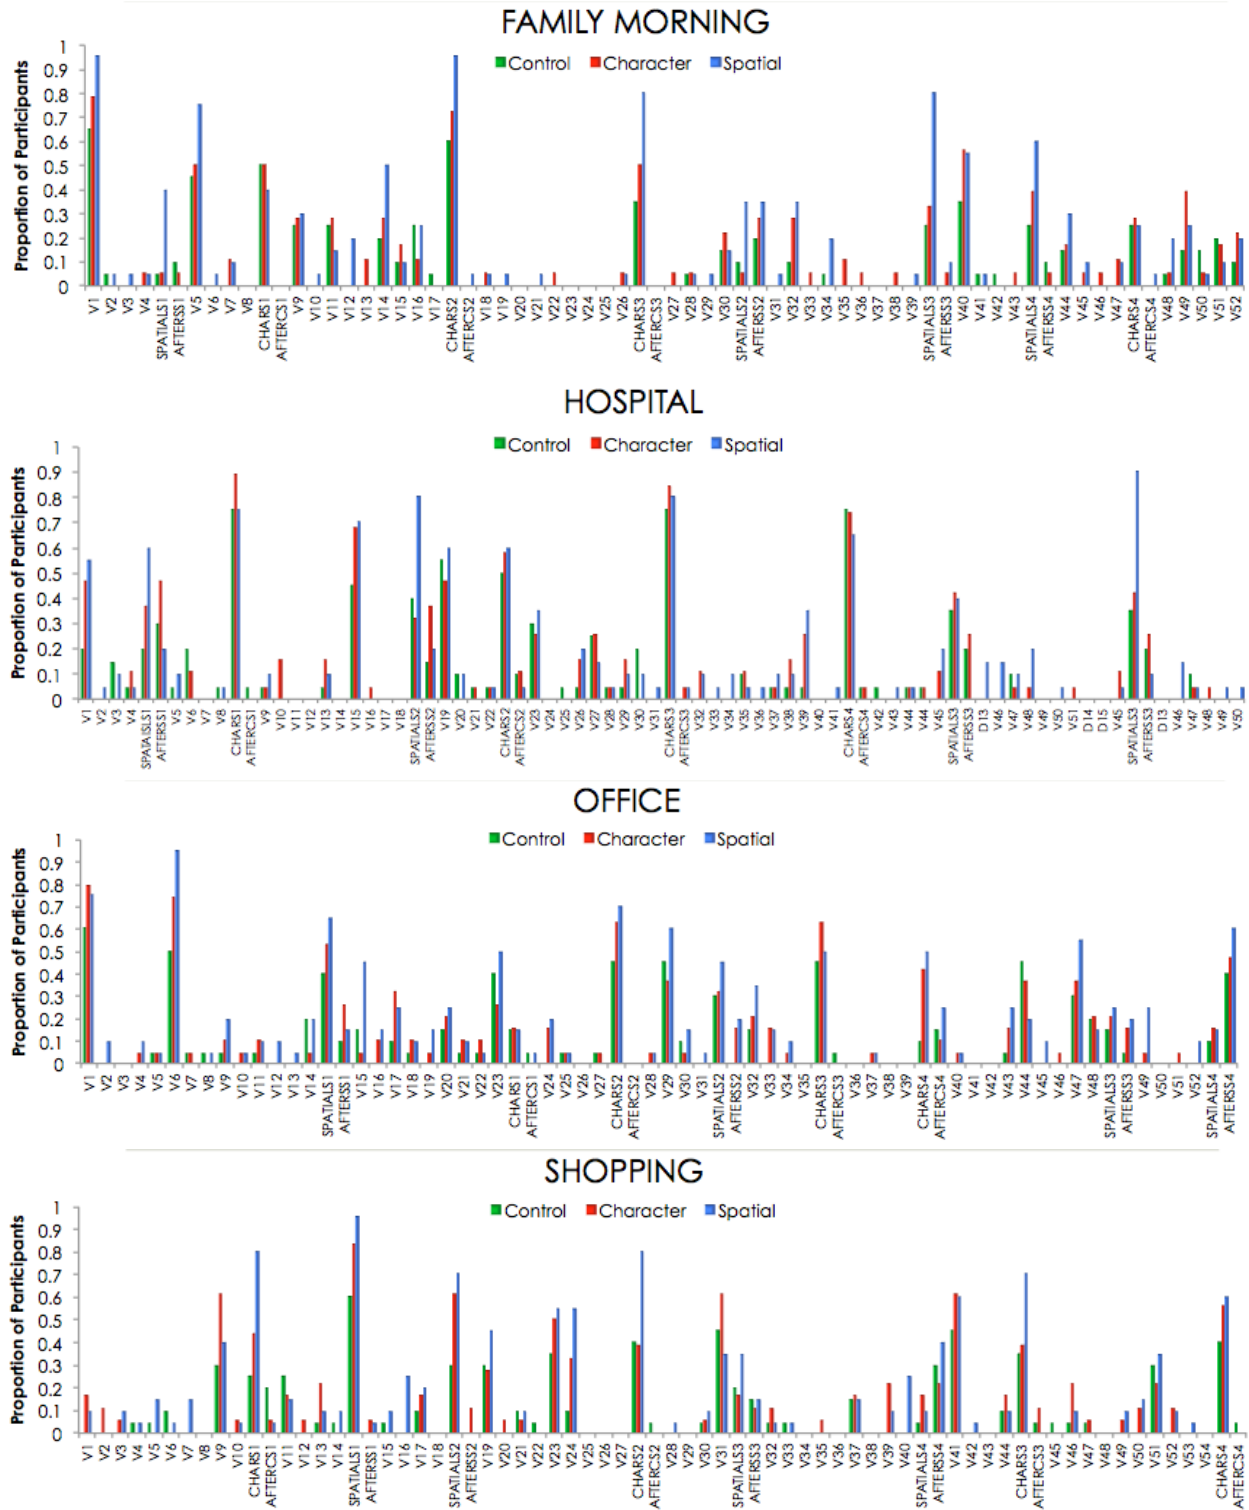

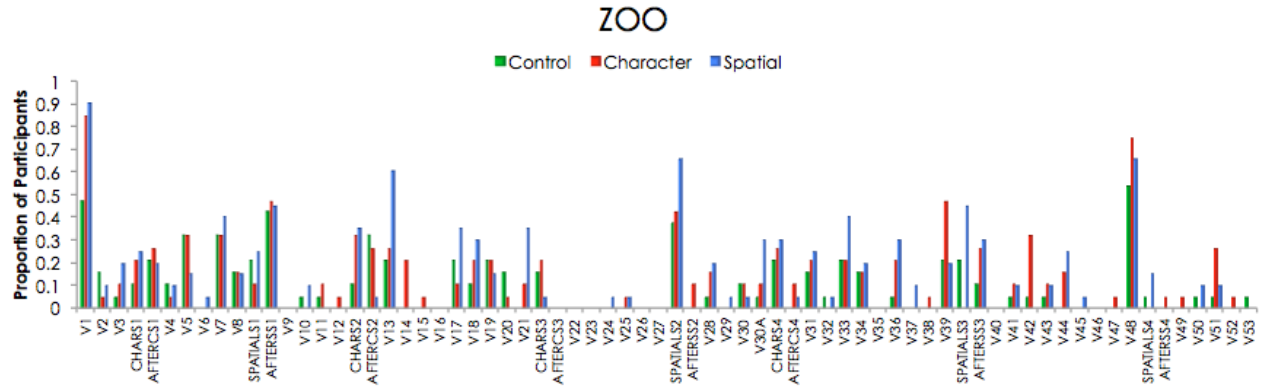

Supplement: NIHMS1757094-supplement-1.pdf [file NIHMS1757094-supplement-1.pdf]
